# Supplementary material for: Extracellular Vesicles and Their miRNA Content in Amniotic and Tracheal Fluids of Fetuses with Severe Congenital Diaphragmatic Hernia Undergoing Fetal Intervention
Source: MDPI journal article supplement (doi:10.3390/cells10061493), 2021-06-14
Supplement: s1 [file s1]

**Table S3.** Screening of miRNA expression levels. Mean concentrations of EV-miRNA levels in survivors and non-survivors measured by OpenArray.

| Amniotic Fluids  |                 |                       |               |                    |                |         | Tracheal Fluids       |               |                    |                |         |                       |
|------------------|-----------------|-----------------------|---------------|--------------------|----------------|---------|-----------------------|---------------|--------------------|----------------|---------|-----------------------|
| miRBase ID (v21) | miRNA name      | Quant Studio Assay ID | Fold Change   | Mean non-survivors | Mean survivors | P-value | Chosen for validation | Fold Change   | Mean non-survivors | Mean survivors | P-value | Chosen for validation |
| hsa-let-7a-5p    | let_7a_000377   | 000377                | 1.353         | 242.016            | 178.841        | 0.4230  |                       | 1.597         | 612.076            | 383.159        | 0.1331  |                       |
| hsa-let-7b-5p    | let_7b_002619   | 002619                | 0.004         | 0.201              | 49.518         | 0.3071  |                       | Not expressed |                    |                |         |                       |
| hsa-let-7c-5p    | let_7c_000379   | 000379                | 1.392         | 47.177             | 33.890         | 0.2826  |                       | 1.256         | 97.361             | 77.546         | 0.2174  |                       |
| hsa-let-7d-3p    | let_7d_001178   | 001178                | 0.807         | 0.864              | 1.071          | 0.5205  |                       | 1.506         | 7.739              | 5.138          | 0.1807  |                       |
| hsa-let-7d-5p    | let_7d_002283   | 002283                | 1.098         | 54.653             | 49.775         | 0.7642  |                       | 1.285         | 156.696            | 121.983        | 0.8549  |                       |
| hsa-let-7e-3p    | let_7e_002407   | 002407                | 0.741         | 0.201              | 0.271          | 0.2907  |                       | 0.899         | 0.393              | 0.437          | 0.2164  |                       |
| hsa-let-7e-5p    | let_7e_002406   | 002406                | 1.499         | 487.686            | 325.234        | 0.0987  |                       | 1.219         | 1188.591           | 975.204        | 0.5560  |                       |
| hsa-let-7f-2-3p  | let_7f_2_002418 | 002418                | Not expressed |                    |                |         |                       | 0.457         | 0.186              | 0.406          | 0.0560  |                       |
| hsa-let-7f-5p    | let_7f_000382   | 000382                | 1.956         | 55.095             | 28.162         | 0.1673  |                       | 1.819         | 133.463            | 73.353         | 0.0891  |                       |
| hsa-let-7g-5p    | let_7g_002282   | 002282                | 1.258         | 69.266             | 55.042         | 0.7924  |                       | 1.851         | 220.327            | 119.010        | 0.0996  |                       |
| hsa-miR-100-5p   | miR_100_000437  | 000437                | 1.490         | 998.499            | 670.145        | 0.2537  |                       | 1.992         | 1131.621           | 568.191        | 0.1279  |                       |
| hsa-miR-101-3p   | miR_101_002253  | 002253                | 1.761         | 3.102              | 1.761          | 0.0761  |                       | 2.398         | 10.161             | 4.237          | 0.2013  |                       |
| hsa-miR-103a-3p  | miR_103_000439  | 000439                | 1.377         | 106.336            | 77.200         | 0.3344  |                       | 1.744         | 261.732            | 150.060        | 0.2244  |                       |
| hsa-miR-106a-5p  | miR_106a_002169 | 002169                | 1.081         | 1593.403           | 1473.507       | 0.6935  |                       | 1.482         | 6576.707           | 4438.804       | 0.2760  |                       |
| hsa-miR-106b-3p  | miR_106b_002380 | 002380                | Not expressed |                    |                |         |                       | 4.426         | 25.333             | 5.723          | 0.0918  |                       |
| hsa-miR-106b-5p  | miR_106b_000442 | 000442                | 1.423         | 235.900            | 165.809        | 0.3463  |                       | 1.812         | 928.627            | 512.599        | 0.7374  |                       |
| hsa-miR-107      | miR_107_000443  | 000443                | 1.621         | 4.016              | 2.477          | 0.0882  |                       | 1.819         | 14.901             | 8.191          | 0.2185  |                       |
| hsa-miR-10a-3p   | miR_10a_002288  | 002288                | 1.047         | 0.254              | 0.243          | 0.4337  |                       | Not expressed |                    |                |         |                       |
| hsa-miR-10a-5p   | miR_10a_000387  | 000387                | 1.186         | 218.433            | 184.197        | 0.6094  |                       | 0.362         | 6.825              | 18.869         | 0.6966  |                       |
| hsa-miR-10b-3p   | miR_10b_002315  | 002315                | 0.972         | 40.183             | 41.324         | 0.9099  |                       | 0.403         | 1.048              | 2.597          | 0.8845  |                       |
| hsa-miR-10b-5p   | miR_10b_002218  | 002218                | 0.932         | 105.442            | 113.149        | 0.8405  |                       | 0.264         | 1.778              | 6.733          | 0.2536  |                       |
| hsa-miR-1180-3p  | miR_1180_002847 | 002847                | 0.880         | 17.049             | 19.370         | 0.9897  |                       | 1.057         | 43.419             | 41.070         | 0.2423  |                       |
| hsa-miR-1183     | miR_1183_002841 | 002841                | 1.078         | 0.347              | 0.322          | 0.8197  |                       | Not expressed |                    |                |         |                       |
| hsa-miR-122-5p   | miR_122_002245  | 002245                | 99.636        | 96.221             | 0.966          | 0.7778  |                       | 2.303         | 0.765              | 0.332          | 0.0397  |                       |
| hsa-miR-1226-5p  | miR_1226_00275  | 002758                | 0.974         | 1.074              | 1.103          | 0.9917  |                       | 0.155         | 0.186              | 1.200          | 0.1608  |                       |

|                   |                    |        |               |         |         |        |               |          |          |        |
|-------------------|--------------------|--------|---------------|---------|---------|--------|---------------|----------|----------|--------|
| hsa-miR-1227-3p   | miR_1227_002769    | 002769 | 4.666         | 10.814  | 2.318   | 0.3157 | 4.394         | 5.874    | 1.337    | 0.6009 |
| hsa-miR-1233-3p   | miR_1233_002768    | 002768 | 0.036         | 0.201   | 5.565   | 0.2870 | 0.279         | 0.186    | 0.665    | 0.2395 |
| hsa-miR-124-3p    | miR_124a_001182    | 001182 | 0.724         | 0.201   | 0.278   | 0.0916 | Not expressed |          |          |        |
| hsa-miR-1244      | miR_1244_002791    | 002791 | 1.019         | 1.039   | 1.020   | 0.8765 | 1.090         | 0.858    | 0.788    | 0.5217 |
| hsa-miR-1247-5p   | miR_1247_002893    | 002893 | 2.800         | 214.098 | 76.457  | 0.1682 | 0.172         | 0.186    | 1.081    | 0.1719 |
| hsa-miR-1255b-5p  | miR_1255B_002801   | 002801 | 3.018         | 1.831   | 0.607   | 0.1444 | 3.556         | 3.078    | 0.865    | 0.1713 |
| hsa-miR-125a-3p   | miR_125a_3p_002199 | 002199 | 1.104         | 0.268   | 0.243   | 0.9674 | 0.503         | 0.364    | 0.724    | 0.0560 |
| hsa-miR-125a-5p   | miR_125a_5p_002198 | 002198 | 0.516         | 18.934  | 36.707  | 0.1204 | 1.025         | 98.207   | 95.772   | 0.4980 |
| hsa-miR-125b-1-3p | miR_125b_1_002378  | 002378 | 1.955         | 0.475   | 0.243   | 0.2959 | 1.498         | 0.559    | 0.373    | 0.5606 |
| hsa-miR-125b-2-3p | miR_125b_2_002158  | 002158 | Not expressed |         |         |        | 0.027         | 0.186    | 6.755    | 0.0278 |
| hsa-miR-125b-5p   | miR_125b_000449    | 000449 | 1.330         | 675.688 | 508.199 | 0.2955 | 1.827         | 1345.400 | 736.302  | 0.1945 |
| hsa-miR-1260a     | miR_1260_002896    | 002896 | 1.693         | 265.512 | 156.849 | 0.8105 | 1.368         | 167.690  | 122.543  | 0.7730 |
| hsa-miR-126-3p    | miR_126_002228     | 002228 | 1.453         | 14.838  | 10.211  | 0.8878 | 2.989         | 34.205   | 11.443   | 0.1331 |
| hsa-miR-126-5p    | miR_126_000451     | 000451 | 1.125         | 3.096   | 2.752   | 0.3434 | 2.629         | 4.187    | 1.593    | 0.7581 |
| hsa-miR-1267      | miR_1267_002885    | 002885 | Not expressed |         |         |        | 0.294         | 0.186    | 0.632    | 0.1376 |
| hsa-miR-1269a     | miR_1269_002789    | 002789 | 1.074         | 0.261   | 0.243   | 0.9178 | 0.875         | 0.291    | 0.332    | 0.0582 |
| hsa-miR-1270      | miR_1270_002807    | 002807 | Not expressed |         |         |        | 0.469         | 0.186    | 0.396    | 0.4464 |
| hsa-miR-1271-5p   | miR_1271_002779    | 002779 | Not expressed |         |         |        | 2.525         | 1.685    | 0.667    | 0.1142 |
| hsa-miR-127-3p    | miR_127_000452     | 000452 | 2.331         | 444.504 | 190.653 | 0.2961 | 1.065         | 11.564   | 10.859   | 0.0826 |
| hsa-miR-128-3p    | miR_128a_002216    | 002216 | 1.143         | 2.559   | 2.239   | 0.5385 | 1.681         | 8.540    | 5.079    | 0.1619 |
| hsa-miR-1290      | miR_1290_002863    | 002863 | 1.474         | 37.040  | 25.126  | 0.2677 | 5.139         | 88.562   | 17.232   | 0.3508 |
| hsa-miR-1291      | miR_1291_002838    | 002838 | 1.000         | 1.472   | 1.472   | 0.8942 | 1.286         | 1.194    | 0.928    | 0.8457 |
| hsa-miR-1303      | miR_1303_002792    | 002792 | 3.103         | 2.514   | 0.810   | 0.9621 | 3.704         | 5.692    | 1.537    | 0.9201 |
| hsa-miR-130a-3p   | miR_130a_000454    | 000454 | 1.282         | 501.867 | 391.588 | 0.3966 | 2.254         | 2843.845 | 1261.922 | 0.1619 |
| hsa-miR-130b-3p   | miR_130b_000456    | 000456 | 1.890         | 45.936  | 24.306  | 0.0926 | 1.802         | 47.963   | 26.610   | 0.5435 |
| hsa-miR-130b-5p   | miR_130b_002114    | 002114 | Not expressed |         |         |        | 0.435         | 0.385    | 0.883    | 0.2270 |
| hsa-miR-132-3p    | miR_132_000457     | 000457 | 1.374         | 88.321  | 64.260  | 0.3891 | 1.647         | 129.743  | 78.783   | 0.2684 |
| hsa-miR-133a-3p   | miR_133a_002246    | 002246 | 4.330         | 8.066   | 1.863   | 0.3283 | 0.253         | 0.186    | 0.734    | 0.1635 |
| hsa-miR-134-5p    | miR_134_001186     | 001186 | 1.645         | 1.922   | 1.169   | 0.9698 | Not expressed |          |          |        |

|                 |                    |        |               |         |         |        |               |          |         |        |
|-----------------|--------------------|--------|---------------|---------|---------|--------|---------------|----------|---------|--------|
| hsa-miR-135a-5p | miR_135a_000460    | 000460 | 1.718         | 11.895  | 6.925   | 0.1421 | 2.732         | 11.525   | 4.218   | 0.0655 |
| hsa-miR-135b-3p | miR_135b__002159   | 002159 | 0.285         | 0.201   | 0.705   | 0.2316 | 0.141         | 0.186    | 1.315   | 0.0885 |
| hsa-miR-135b-5p | miR_135b_002261    | 002261 | 1.533         | 87.705  | 57.227  | 0.2795 | 1.871         | 130.686  | 69.841  | 0.1459 |
| hsa-miR-136-3p  | miR_136__002100    | 002100 | 1.748         | 19.486  | 11.149  | 0.1441 | 0.774         | 0.563    | 0.727   | 0.2151 |
| hsa-miR-137     | miR_137_001129     | 001129 | 0.956         | 0.232   | 0.243   | 0.8250 | 1.701         | 0.565    | 0.332   | 0.2115 |
| hsa-miR-138-5p  | miR_138_002284     | 002284 | 1.124         | 53.942  | 48.005  | 0.9677 | 1.564         | 512.136  | 327.536 | 0.1337 |
| hsa-miR-140-3p  | miR_140_3p_002234  | 002234 | 1.186         | 1.157   | 0.975   | 0.7756 | 1.753         | 3.802    | 2.169   | 0.3235 |
| hsa-miR-140-5p  | miR_140_001187     | 001187 | 1.043         | 15.623  | 14.974  | 0.8629 | 1.477         | 75.795   | 51.317  | 0.3343 |
| hsa-miR-141-3p  | miR_141_000463     | 000463 | 1.603         | 661.160 | 412.385 | 0.7152 | 2.564         | 2339.284 | 912.307 | 0.1361 |
| hsa-miR-141-5p  | miR_141__002145    | 002145 | 1.249         | 0.303   | 0.243   | 0.1706 | 0.507         | 0.231    | 0.455   | 0.1189 |
| hsa-miR-142-3p  | miR_142_3p_000464  | 000464 | 2.841         | 4.818   | 1.696   | 0.2748 | 2.399         | 27.099   | 11.295  | 0.0384 |
| hsa-miR-143-3p  | miR_143_002249     | 002249 | 2.111         | 2.090   | 0.990   | 0.2611 | 1.546         | 0.590    | 0.381   | 0.9677 |
| hsa-miR-145-5p  | miR_145_002278     | 002278 | 0.573         | 0.201   | 0.351   | 0.1945 | Not expressed |          |         |        |
| hsa-miR-146a-5p | miR_146a_000468    | 000468 | 1.386         | 183.780 | 132.641 | 0.2683 | 2.180         | 518.940  | 237.997 | 0.0969 |
| hsa-miR-146b-3p | miR_146b_3p_002361 | 002361 | 1.348         | 0.551   | 0.408   | 0.4896 | 1.840         | 2.237    | 1.215   | 0.0789 |
| hsa-miR-146b-5p | miR_146b_001097    | 001097 | 1.174         | 151.818 | 129.337 | 0.5204 | 2.064         | 760.272  | 368.261 | 0.1795 |
| hsa-miR-147a    | miR_147_000469     | 000469 | 0.634         | 0.201   | 0.318   | 0.0877 | Not expressed |          |         |        |
| hsa-miR-148a-3p | miR_148a_000470    | 000470 | 1.408         | 88.308  | 62.725  | 0.3988 | 2.040         | 199.566  | 97.845  | 0.1751 |
| hsa-miR-148b-3p | miR_148b_000471    | 000471 | 0.791         | 2.699   | 3.412   | 0.3072 | 1.024         | 6.384    | 6.233   | 0.5939 |
| hsa-miR-148b-5p | miR_148b__002160   | 002160 | 1.410         | 0.564   | 0.400   | 0.7069 | 1.631         | 2.602    | 1.595   | 0.8018 |
| hsa-miR-149-5p  | miR_149_002255     | 002255 | 1.193         | 567.106 | 475.274 | 0.4170 | 0.707         | 609.664  | 862.099 | 0.6375 |
| hsa-miR-150-5p  | miR_150_000473     | 000473 | 1.046         | 58.635  | 56.041  | 0.5165 | 0.632         | 34.958   | 55.309  | 0.4268 |
| hsa-miR-151a-3p | miR_151_3p_002254  | 002254 | 0.881         | 37.511  | 42.560  | 0.9370 | 18.929        | 5791.676 | 305.974 | 0.1543 |
| hsa-miR-151a-5p | miR_151_5P_002642  | 002642 | 0.922         | 4.510   | 4.891   | 0.5330 | 1.146         | 16.549   | 14.438  | 0.7793 |
| hsa-miR-152-3p  | miR_152_000475     | 000475 | 1.579         | 43.090  | 27.298  | 0.1681 | 1.598         | 32.754   | 20.500  | 0.2904 |
| hsa-miR-154-3p  | miR_154__000478    | 000478 | 2.874         | 2.719   | 0.946   | 0.3732 | 0.703         | 0.234    | 0.332   | 0.6843 |
| hsa-miR-154-5p  | miR_154_000477     | 000477 | 3.679         | 0.894   | 0.243   | 0.2370 | Not expressed |          |         |        |
| hsa-miR-155-5p  | miR_155_002623     | 002623 | 2.116         | 1.721   | 0.814   | 0.3674 | 0.558         | 3.078    | 5.519   | 0.9815 |
| hsa-miR-15a-3p  | miR_15a__002419    | 002419 | Not expressed |         |         |        | 0.470         | 0.186    | 0.395   | 0.1552 |
| hsa-miR-15a-5p  | miR_15a_000389     | 000389 | 1.062         | 4.671   | 4.397   | 0.6250 | 2.287         | 27.913   | 12.205  | 0.1454 |

|                        |                       |               |               |              |              |               |               |              |              |               |        |
|------------------------|-----------------------|---------------|---------------|--------------|--------------|---------------|---------------|--------------|--------------|---------------|--------|
| hsa-miR-15b-3p         | miR_15b__002173       | 002173        | Not expressed |              |              |               | 0.017         | 0.186        | 11.211       | 0.2098        |        |
| hsa-miR-15b-5p         | miR_15b_000390        | 000390        | 1.329         | 110.318      | 83.033       | 0.6173        | 1.967         | 635.849      | 323.308      | 0.0428        |        |
| hsa-miR-16-1-3p        | miR_16_1__002420      | 002420        | 1.349         | 0.328        | 0.243        | 0.6630        | 1.204         | 0.598        | 0.497        | 0.7536        |        |
| hsa-miR-16-5p          | miR_16_000391         | 000391        | 1.106         | 521.713      | 471.523      | 0.6507        | 1.580         | 2954.325     | 1869.606     | 0.1593        |        |
| <b>hsa-miR-17-3p</b>   | <b>miR_17__002421</b> | <b>002421</b> | Not expressed |              |              |               | <b>0.268</b>  | <b>0.186</b> | <b>0.692</b> | <b>0.0084</b> | *      |
| hsa-miR-17-5p          | miR_17_002308         | 002308        | 1.090         | 1579.202     | 1448.433     | 0.4825        | 1.434         | 5898.723     | 4112.506     | 0.2915        |        |
| hsa-miR-181a-2-3p      | miR_181a_2__002317    | 002317        | 0.891         | 35.031       | 39.328       | 0.8826        | 1.349         | 170.307      | 126.260      | 0.2789        |        |
| hsa-miR-181a-3p        | miR_213_000516        | 000516        | 1.624         | 3.778        | 2.326        | 0.2637        | 1.514         | 24.065       | 15.898       | 0.3414        |        |
| hsa-miR-181a-5p        | miR_181a_000480       | 000480        | 1.224         | 377.265      | 308.128      | 0.5150        | 1.913         | 1560.126     | 815.588      | 0.6047        |        |
| hsa-miR-181c-3p        | miR_181c__002333      | 002333        | 1.725         | 0.419        | 0.243        | 0.3930        | 2.137         | 19.160       | 8.968        | 0.8812        |        |
| hsa-miR-181c-5p        | miR_181c_000482       | 000482        | 1.433         | 7.179        | 5.009        | 0.7919        | 1.292         | 23.726       | 18.360       | 0.4710        |        |
| hsa-miR-182-5p         | miR_182_002334        | 002334        | 1.153         | 0.280        | 0.243        | 0.4272        | 0.565         | 0.236        | 0.417        | 0.1679        |        |
| hsa-miR-183-3p         | miR_183__002270       | 002270        | 0.837         | 5.091        | 6.084        | 0.1115        | 1.037         | 9.254        | 8.921        | 0.0466        |        |
| hsa-miR-183-5p         | miR_183_002269        | 002269        | 0.263         | 0.344        | 1.311        | 0.4655        | 0.115         | 0.186        | 1.611        | 0.3855        |        |
| hsa-miR-184            | miR_184_000485        | 000485        | 1.356         | 26.704       | 19.696       | 0.3637        | 0.122         | 1.990        | 16.318       | 0.2733        |        |
| hsa-miR-185-5p         | miR_185_002271        | 002271        | 0.894         | 1.114        | 1.246        | 0.7817        | 1.161         | 3.619        | 3.117        | 0.6141        |        |
| hsa-miR-186-5p         | miR_186_002285        | 002285        | 1.059         | 110.876      | 104.671      | 0.7305        | 1.406         | 400.081      | 284.556      | 0.4208        |        |
| hsa-miR-187-3p         | miR_187_001193        | 001193        | 1.666         | 0.755        | 0.454        | 0.9301        | Not expressed |              |              |               |        |
| hsa-miR-188-3p         | miR_188_3p_002106     | 002106        | 0.593         | 0.201        | 0.339        | 0.1935        | Not expressed |              |              |               |        |
| hsa-miR-18a-3p         | miR_18a__002423       | 002423        | Not expressed |              |              |               | 0.670         | 0.361        | 0.540        | 0.1381        |        |
| hsa-miR-18a-5p         | miR_18a_002422        | 002422        | 1.105         | 6.335        | 5.733        | 0.7504        | 1.480         | 24.471       | 16.536       | 0.2622        |        |
| <b>hsa-miR-190a-5p</b> | <b>miR_190_000489</b> | 000489        | <b>2.546</b>  | <b>3.912</b> | <b>1.537</b> | <b>0.0478</b> | *             | 1.728        | 3.454        | 1.999         | 0.1021 |
| hsa-miR-190b           | miR_190b_002263       | 002263        | 0.891         | 14.090       | 15.807       | 0.9577        | 1.226         | 52.446       | 42.789       | 0.4136        |        |
| hsa-miR-191-5p         | miR_191_002299        | 002299        | 1.164         | 1303.869     | 1120.564     | 0.4887        | 1.144         | 2762.656     | 2414.468     | 0.4440        |        |
| hsa-miR-192-3p         | miR_192__002272       | 002272        | 5.989         | 1.455        | 0.243        | 0.0837        | Not expressed |              |              |               |        |
| hsa-miR-192-5p         | miR_192_000491        | 000491        | 20.496        | 827.018      | 40.350       | 0.4651        | 3.005         | 54.801       | 18.240       | 0.0856        |        |
| hsa-miR-193a-5p        | miR_193a_5p_002281    | 002281        | 1.668         | 14.025       | 8.407        | 0.1287        | 0.842         | 7.309        | 8.684        | 0.4792        |        |
| hsa-miR-193b-3p        | miR_193b_002367       | 002367        | 1.772         | 3598.287     | 2031.141     | 0.6937        | 1.562         | 685.967      | 439.096      | 0.2751        |        |
| hsa-miR-193b-5p        | miR_193b__002366      | 002366        | 0.918         | 1.269        | 1.382        | 0.0908        | Not expressed |              |              |               |        |
| hsa-miR-194-5p         | miR_194_000493        | 000493        | 29.885        | 640.668      | 21.438       | 0.0736        | 3.175         | 44.156       | 13.909       | 0.1116        |        |

|                        |                        |               |               |          |          |        |               |                 |                 |               |   |
|------------------------|------------------------|---------------|---------------|----------|----------|--------|---------------|-----------------|-----------------|---------------|---|
| hsa-miR-195-5p         | miR_195_000494         | 000494        | 1.029         | 9.260    | 8.999    | 0.8289 | 1.629         | 44.309          | 27.207          | 0.2990        |   |
| hsa-miR-196b-5p        | miR_196b_002215        | 002215        | 2.928         | 2.461    | 0.840    | 0.1938 | Not expressed |                 |                 |               |   |
| hsa-miR-197-3p         | miR_197_000497         | 000497        | 0.009         | 0.201    | 22.211   | 0.3198 | 0.002         | 0.186           | 111.700         | 0.2083        |   |
| hsa-miR-199a-5p        | miR_199a_000498        | 000498        | 0.523         | 0.201    | 0.385    | 0.1082 | Not expressed |                 |                 |               |   |
| hsa-miR-19a-3p         | miR_19a_000395         | 000395        | 1.454         | 47.639   | 32.775   | 0.3903 | 1.911         | 161.150         | 84.342          | 0.1945        |   |
| hsa-miR-19b-1-5p       | miR_19b_1_002425       | 002425        | Not expressed |          |          |        | 2.026         | 1.844           | 0.910           | 0.8747        |   |
| hsa-miR-19b-3p         | miR_19b_000396         | 000396        | 1.307         | 2167.554 | 1658.030 | 0.2368 | 2.126         | 8235.957        | 3874.536        | 0.1808        |   |
| <b>hsa-miR-200a-3p</b> | <b>miR_200a_000502</b> | <b>000502</b> | 1.393         | 847.936  | 608.576  | 0.2953 | <b>2.087</b>  | <b>2627.125</b> | <b>1258.981</b> | <b>0.0005</b> | * |
| hsa-miR-200a-5p        | miR_200a_001011        | 001011        | 0.450         | 0.625    | 1.390    | 0.2569 | 0.022         | 0.186           | 8.265           | 0.1682        |   |
| hsa-miR-200b-3p        | miR_200b_002251        | 002251        | 1.188         | 1440.145 | 1212.094 | 0.2830 | 1.484         | 3509.055        | 2364.104        | 0.2943        |   |
| <b>hsa-miR-200b-5p</b> | <b>miR_200b_002274</b> | <b>002274</b> | 0.247         | 0.201    | 0.813    | 0.5291 | <b>0.004</b>  | <b>0.186</b>    | <b>52.548</b>   | <b>0.0104</b> | * |
| hsa-miR-200c-3p        | miR_200c_002300        | 002300        | 1.162         | 4256.241 | 3661.670 | 0.9614 | 1.396         | 13218.046       | 9466.432        | 0.1801        |   |
| hsa-miR-203a-3p        | miR_203_000507         | 000507        | 1.466         | 9541.599 | 6510.098 | 0.2816 | 1.515         | 5975.552        | 3945.119        | 0.2809        |   |
| hsa-miR-204-5p         | miR_204_000508         | 000508        | 1.004         | 860.416  | 857.321  | 0.6671 | 1.870         | 1018.986        | 545.049         | 0.1580        |   |
| hsa-miR-205-5p         | miR_205_000509         | 000509        | 1.377         | 279.352  | 202.854  | 0.2912 | 1.146         | 170.191         | 148.533         | 0.2905        |   |
| hsa-miR-206            | miR_206_000510         | 000510        | 1.724         | 5.190    | 3.011    | 0.3173 | 1.275         | 0.424           | 0.332           | 0.6351        |   |
| hsa-miR-20a-3p         | miR_20a_002437         | 002437        | 1.241         | 5.937    | 4.784    | 0.5531 | 2.303         | 20.591          | 8.939           | 0.0998        |   |
| hsa-miR-20a-5p         | miR_20a_000580         | 000580        | 1.218         | 1975.490 | 1622.172 | 0.3343 | 1.794         | 9384.614        | 5231.705        | 0.1148        |   |
| hsa-miR-20b-5p         | miR_20b_001014         | 001014        | 0.892         | 17.076   | 19.142   | 0.9113 | 1.658         | 58.043          | 35.009          | 0.2521        |   |
| hsa-miR-210-3p         | miR_210_000512         | 000512        | 1.573         | 725.034  | 461.053  | 0.2289 | 1.462         | 844.220         | 577.374         | 0.4252        |   |
| hsa-miR-212-3p         | miR_212_000515         | 000515        | 1.628         | 6.071    | 3.730    | 0.5136 | 2.828         | 6.550           | 2.316           | 0.2213        |   |
| hsa-miR-214-3p         | miR_214_002306         | 002306        | 0.383         | 0.201    | 0.525    | 0.4511 | 0.297         | 0.186           | 0.626           | 0.3096        |   |
| hsa-miR-215-5p         | miR_215_000518         | 000518        | 33.442        | 806.392  | 24.113   | 0.0889 | 8.713         | 26.439          | 3.034           | 0.2277        |   |
| hsa-miR-21-5p          | miR_21_000397          | 000397        | 1.100         | 753.293  | 684.983  | 0.1600 | 1.587         | 3033.257        | 1911.814        | 0.2477        |   |
| hsa-miR-216b-5p        | miR_216b_002326        | 002326        | 0.712         | 0.201    | 0.283    | 0.3885 | 0.510         | 0.186           | 0.364           | 0.1644        |   |
| hsa-miR-218-5p         | miR_218_000521         | 000521        | 1.381         | 68.840   | 49.842   | 0.2559 | 2.591         | 273.159         | 105.430         | 0.7204        |   |
| hsa-miR-219a-5p        | miR_219_000522         | 000522        | Not expressed |          |          |        | 1.134         | 0.377           | 0.332           | 0.9850        |   |
| hsa-miR-221-3p         | miR_221_000524         | 000524        | 1.631         | 1063.245 | 651.812  | 0.1415 | 1.099         | 917.486         | 834.778         | 0.0542        |   |
| hsa-miR-221-5p         | miR_221_002096         | 002096        | 0.836         | 0.228    | 0.272    | 0.2858 | 0.705         | 0.271           | 0.385           | 0.4782        |   |
| hsa-miR-222-3p         | miR_222_002276         | 002276        | 1.543         | 4891.653 | 3170.809 | 0.3905 | 1.042         | 5917.831        | 5678.521        | 0.6523        |   |
| hsa-miR-222-5p         | miR_222_002097         | 002097        | 0.816         | 2.913    | 3.570    | 0.4604 | 0.066         | 0.186           | 2.814           | 0.0226        |   |

|                       |                       |               |               |          |          |        |               |                 |                |               |   |
|-----------------------|-----------------------|---------------|---------------|----------|----------|--------|---------------|-----------------|----------------|---------------|---|
| <b>hsa-miR-223-3p</b> | <b>miR_223_002295</b> | <b>002295</b> | 1.314         | 104.222  | 79.334   | 0.4134 | <b>3.506</b>  | <b>1274.378</b> | <b>363.441</b> | <b>0.0226</b> | * |
| hsa-miR-223-5p        | miR_223_002098        | 002098        | 1.002         | 0.243    | 0.243    | 0.7745 | 0.977         | 0.324           | 0.332          | 0.2070        |   |
| hsa-miR-22-3p         | miR_22_000398         | 000398        | Not expressed |          |          |        | 11.476        | 44.821          | 3.906          | 0.5415        |   |
| hsa-miR-224-5p        | miR_224_002099        | 002099        | 1.276         | 56.546   | 44.300   | 0.4121 | 1.783         | 213.175         | 119.527        | 0.1004        |   |
| hsa-miR-22-5p         | miR_22_002301         | 002301        | 1.125         | 6.927    | 6.159    | 0.2264 | 1.558         | 21.350          | 13.702         | 0.1985        |   |
| hsa-miR-23b-3p        | miR_23b_000400        | 000400        | Not expressed |          |          |        | 1.834         | 185.129         | 100.919        | 0.5750        |   |
| hsa-miR-24-2-5p       | miR_24_2_002441       | 002441        | 2.140         | 3.031    | 1.416    | 0.5026 | 0.423         | 0.684           | 1.617          | 0.1229        |   |
| hsa-miR-24-3p         | miR_24_000402         | 000402        | 1.562         | 7284.808 | 4663.688 | 0.1699 | 1.517         | 9855.987        | 6496.326       | 0.2857        |   |
| hsa-miR-25-3p         | miR_25_000403         | 000403        | 1.094         | 37.492   | 34.277   | 0.5854 | 1.765         | 144.208         | 81.712         | 0.0977        |   |
| hsa-miR-26a-1-3p      | miR_26a_1_002443      | 002443        | Not expressed |          |          |        | 0.643         | 0.336           | 0.523          | 0.2108        |   |
| hsa-miR-26a-2-3p      | miR_26a_2_002115      | 002115        | Not expressed |          |          |        | 0.506         | 0.186           | 0.367          | 0.1664        |   |
| hsa-miR-26a-5p        | miR_26a_000405        | 000405        | 1.312         | 1710.230 | 1303.715 | 0.3353 | 1.800         | 5576.417        | 3098.006       | 0.1117        |   |
| hsa-miR-26b-3p        | miR_26b_002444        | 002444        | 0.796         | 0.381    | 0.478    | 0.3287 | 1.273         | 1.291           | 1.014          | 0.0835        |   |
| hsa-miR-26b-5p        | miR_26b_000407        | 000407        | 1.357         | 332.701  | 245.194  | 0.9085 | 1.993         | 976.434         | 489.825        | 0.8163        |   |
| hsa-miR-27a-3p        | miR_27a_000408        | 000408        | 1.848         | 162.638  | 88.012   | 0.7168 | 1.975         | 167.996         | 85.041         | 0.0720        |   |
| hsa-miR-27a-5p        | miR_27a_002445        | 002445        | 0.793         | 5.924    | 7.465    | 0.1255 | 0.330         | 0.496           | 1.502          | 0.0872        |   |
| hsa-miR-27b-3p        | miR_27b_000409        | 000409        | 1.697         | 142.191  | 83.775   | 0.2927 | 1.609         | 412.070         | 256.061        | 0.9714        |   |
| hsa-miR-27b-5p        | miR_27b_002174        | 002174        | 1.531         | 2.464    | 1.609    | 0.1476 | 1.231         | 8.275           | 6.722          | 0.1199        |   |
| hsa-miR-28-3p         | miR_28_3p_002446      | 002446        | 1.101         | 103.720  | 94.218   | 0.8331 | 0.890         | 155.991         | 175.358        | 0.5505        |   |
| hsa-miR-28-5p         | miR_28_000411         | 000411        | 1.655         | 44.071   | 26.630   | 0.2837 | 1.489         | 90.003          | 60.441         | 0.2537        |   |
| hsa-miR-296-5p        | miR_296_000527        | 000527        | 2.603         | 14.527   | 5.581    | 0.7004 | 1.428         | 36.001          | 25.207         | 0.8342        |   |
| hsa-miR-29a-3p        | miR_29a_002112        | 002112        | 1.263         | 28.484   | 22.548   | 0.1817 | 1.810         | 163.967         | 90.583         | 0.1270        |   |
| hsa-miR-29a-5p        | miR_29a_002447        | 002447        | 2.124         | 3.356    | 1.580    | 0.6486 | 2.344         | 9.318           | 3.976          | 0.2995        |   |
| hsa-miR-29b-2-5p      | miR_29b_2_002166      | 002166        | Not expressed |          |          |        | 1.496         | 1.043           | 0.697          | 0.6047        |   |
| <b>hsa-miR-29b-3p</b> | <b>miR_29b_000413</b> | <b>000413</b> | 1.261         | 2.259    | 1.792    | 0.5727 | <b>2.685</b>  | <b>6.248</b>    | <b>2.327</b>   | <b>0.0241</b> | * |
| hsa-miR-29c-3p        | miR_29c_000587        | 000587        | 0.891         | 55.344   | 62.130   | 0.2787 | 0.841         | 252.742         | 300.654        | 0.0885        |   |
| hsa-miR-29c-5p        | miR_29c_001818        | 001818        | 1.544         | 0.563    | 0.364    | 0.5679 | 1.944         | 1.642           | 0.845          | 0.4091        |   |
| hsa-miR-301a-3p       | miR_301_000528        | 000528        | 1.053         | 37.340   | 35.445   | 0.7005 | 1.864         | 168.470         | 90.374         | 0.1148        |   |
| hsa-miR-301b-3p       | miR_301b_002392       | 002392        | 1.608         | 2.832    | 1.761    | 0.1688 | 1.108         | 2.793           | 2.520          | 0.4389        |   |
| hsa-miR-302a-3p       | miR_302a_000529       | 000529        | 3.105         | 0.754    | 0.243    | 0.1829 | Not expressed |                 |                |               |   |

|                 |                   |        |               |           |          |        |               |           |           |        |
|-----------------|-------------------|--------|---------------|-----------|----------|--------|---------------|-----------|-----------|--------|
| hsa-miR-302b-3p | miR_302b_000531   | 000531 | Not expressed |           |          |        | 0.976         | 0.324     | 0.332     | 0.9774 |
| hsa-miR-30a-3p  | miR_30a_3p_000416 | 000416 | 0.893         | 346.757   | 388.499  | 0.8584 | 1.485         | 721.226   | 485.575   | 0.0984 |
| hsa-miR-30a-5p  | miR_30a_5p_000417 | 000417 | 0.865         | 7338.502  | 8488.317 | 0.9139 | 1.733         | 70985.527 | 40958.146 | 0.1601 |
| hsa-miR-30b-5p  | miR_30b_000602    | 000602 | 0.893         | 8283.629  | 9280.758 | 0.4162 | 2.187         | 88024.468 | 40242.314 | 0.1379 |
| hsa-miR-30c-5p  | miR_30c_000419    | 000419 | 1.282         | 10506.707 | 8195.347 | 0.4264 | 2.155         | 50221.090 | 23309.686 | 0.1479 |
| hsa-miR-30d-3p  | miR_30d_002305    | 002305 | 0.972         | 5.643     | 5.808    | 0.9163 | 2.183         | 63.590    | 29.136    | 0.1923 |
| hsa-miR-30d-5p  | miR_30d_000420    | 000420 | 0.851         | 1845.687  | 2169.240 | 0.8786 | 1.833         | 18178.353 | 9919.361  | 0.0989 |
| hsa-miR-30e-3p  | miR_30e_3p_000422 | 000422 | 1.087         | 364.520   | 335.254  | 0.7358 | 1.224         | 656.011   | 536.019   | 0.0969 |
| hsa-miR-31-3p   | miR_31_002113     | 002113 | 1.515         | 36.874    | 24.338   | 0.3170 | 2.181         | 11.315    | 5.189     | 0.4930 |
| hsa-miR-31-5p   | miR_31_002279     | 002279 | 1.670         | 173.695   | 104.035  | 0.4459 | 1.224         | 58.782    | 48.013    | 0.1385 |
| hsa-miR-320a    | miR_320_002277    | 002277 | 1.322         | 1822.266  | 1378.846 | 0.2102 | 1.067         | 1713.194  | 1606.216  | 0.3278 |
| hsa-miR-320b    | miR_320B_002844   | 002844 | 1.086         | 12.556    | 11.561   | 0.8975 | 1.051         | 15.015    | 14.288    | 0.3506 |
| hsa-miR-323a-3p | miR_323_3p_002227 | 002227 | 1.157         | 15.464    | 13.371   | 0.3069 | 0.813         | 0.793     | 0.976     | 0.2697 |
| hsa-miR-324-3p  | miR_324_3p_002161 | 002161 | 1.542         | 28.319    | 18.361   | 0.1603 | 1.566         | 70.454    | 44.995    | 0.1773 |
| hsa-miR-324-5p  | miR_324_5p_000539 | 000539 | 1.654         | 38.654    | 23.375   | 0.2375 | 1.894         | 77.216    | 40.760    | 0.4184 |
| hsa-miR-32-5p   | miR_32_002109     | 002109 | 1.236         | 0.624     | 0.504    | 0.3902 | 0.882         | 1.302     | 1.476     | 0.5704 |
| hsa-miR-326     | miR_326_000542    | 000542 | Not expressed |           |          |        | 1.015         | 1.326     | 1.306     | 0.1723 |
| hsa-miR-328-3p  | miR_328_000543    | 000543 | 1.437         | 187.473   | 130.486  | 0.8754 | 1.458         | 321.834   | 220.715   | 0.9691 |
| hsa-miR-329-3p  | miR_329_001101    | 001101 | 1.336         | 0.530     | 0.396    | 0.4778 | Not expressed |           |           |        |
| hsa-miR-330-3p  | miR_330_000544    | 000544 | 0.651         | 0.484     | 0.743    | 0.6751 | 0.918         | 2.356     | 2.566     | 0.7387 |
| hsa-miR-331-3p  | miR_331_000545    | 000545 | 1.296         | 586.380   | 452.425  | 0.3410 | 1.426         | 1708.832  | 1198.110  | 0.3001 |
| hsa-miR-331-5p  | miR_331_5p_002233 | 002233 | 0.098         | 0.201     | 2.045    | 0.2990 | 0.939         | 0.822     | 0.875     | 0.4024 |
| hsa-miR-335-3p  | miR_335_002185    | 002185 | Not expressed |           |          |        | 2.526         | 4.808     | 1.903     | 0.0795 |
| hsa-miR-335-5p  | miR_335_000546    | 000546 | 1.581         | 108.953   | 68.898   | 0.2056 | 2.060         | 288.532   | 140.076   | 0.8144 |
| hsa-miR-337-3p  | miR_337_3p_002157 | 002157 | 0.990         | 1.279     | 1.292    | 0.9950 | 0.756         | 0.251     | 0.332     | 0.8178 |
| hsa-miR-337-5p  | miR_337_5p_002156 | 002156 | 2.525         | 3.058     | 1.211    | 0.5952 | 0.692         | 0.255     | 0.368     | 0.5111 |
| hsa-miR-338-3p  | miR_338_3p_002252 | 002252 | 1.222         | 1.565     | 1.281    | 0.7933 | 2.061         | 16.135    | 7.830     | 0.1909 |
| hsa-miR-339-3p  | miR_339_3p_002184 | 002184 | 1.223         | 6.254     | 5.115    | 0.5397 | 1.690         | 26.035    | 15.410    | 0.3305 |
| hsa-miR-339-5p  | miR_339_5p_002257 | 002257 | 0.985         | 28.772    | 29.221   | 0.9779 | 1.167         | 96.468    | 82.655    | 0.1884 |

|                 |                   |        |               |          |          |        |               |          |          |        |
|-----------------|-------------------|--------|---------------|----------|----------|--------|---------------|----------|----------|--------|
| hsa-miR-33a-3p  | miR_33a__002136   | 002136 | Not expressed |          |          |        | 0.300         | 0.186    | 0.619    | 0.0616 |
| hsa-miR-340-3p  | miR_340__002259   | 002259 | 0.873         | 5.789    | 6.629    | 0.6361 | 1.544         | 19.392   | 12.559   | 0.1605 |
| hsa-miR-340-5p  | miR_340_002258    | 002258 | 1.137         | 3.578    | 3.147    | 0.5349 | 1.376         | 11.656   | 8.471    | 0.1155 |
| hsa-miR-342-3p  | miR_342_3p_002260 | 002260 | 1.552         | 130.270  | 83.924   | 0.9139 | 0.735         | 458.902  | 624.235  | 0.2600 |
| hsa-miR-345-5p  | miR_345_002186    | 002186 | 1.092         | 26.611   | 24.363   | 0.5057 | 1.317         | 104.084  | 79.023   | 0.3855 |
| hsa-miR-34a-3p  | miR_34a__002316   | 002316 | 0.857         | 10.142   | 11.830   | 0.2624 | 1.286         | 34.206   | 26.599   | 0.2866 |
| hsa-miR-34a-5p  | miR_34a_000426    | 000426 | 1.770         | 81.511   | 46.049   | 0.9184 | 1.389         | 144.092  | 103.754  | 0.4278 |
| hsa-miR-34b-3p  | miR_34b_002102    | 002102 | 0.773         | 1032.781 | 1336.612 | 0.7245 | 1.347         | 3012.594 | 2236.372 | 0.3592 |
| hsa-miR-34b-5p  | miR_34b_000427    | 000427 | 1.429         | 24.843   | 17.390   | 0.2050 | 1.696         | 117.556  | 69.318   | 0.3093 |
| hsa-miR-34c-5p  | miR_34c_000428    | 000428 | 1.344         | 87.997   | 65.471   | 0.3071 | 1.579         | 332.197  | 210.439  | 0.1765 |
| hsa-miR-361-3p  | miR_361_3p_002116 | 002116 | Not expressed |          |          |        | 0.399         | 0.186    | 0.465    | 0.2569 |
| hsa-miR-361-5p  | miR_361_000554    | 000554 | 1.378         | 30.553   | 22.179   | 0.2947 | 1.385         | 54.917   | 39.660   | 0.1695 |
| hsa-miR-362-3p  | miR_362_3p_002117 | 002117 | 1.681         | 0.933    | 0.555    | 0.3412 | 0.859         | 1.212    | 1.411    | 0.8360 |
| hsa-miR-362-5p  | miR_362_001273    | 001273 | 1.267         | 30.011   | 23.691   | 0.2856 | 1.209         | 30.927   | 25.575   | 0.3564 |
| hsa-miR-363-3p  | miR_363_001271    | 001271 | 1.025         | 2.398    | 2.339    | 0.5541 | 0.974         | 0.995    | 1.021    | 0.8826 |
| hsa-miR-365a-3p | miR_365_001020    | 001020 | 1.823         | 233.770  | 128.217  | 0.7878 | 1.259         | 69.976   | 55.585   | 0.3542 |
| hsa-miR-365b-3p | miR_365_001020    | 001020 | 1.823         | 233.770  | 128.217  | 0.7878 | 1.259         | 69.976   | 55.585   | 0.3542 |
| hsa-miR-367-3p  | miR_367_000555    | 000555 | 44.662        | 68.034   | 1.523    | 0.1429 | Not expressed |          |          |        |
| hsa-miR-369-3p  | miR_369_3p_000557 | 000557 | 3.060         | 1.696    | 0.554    | 0.1371 | Not expressed |          |          |        |
| hsa-miR-370-3p  | miR_370_002275    | 002275 | 1.976         | 37.993   | 19.228   | 0.8832 | Not expressed |          |          |        |
| hsa-miR-372-3p  | miR_372_000560    | 000560 | 1.219         | 0.431    | 0.354    | 0.7621 | 1.094         | 0.625    | 0.571    | 0.8010 |
| hsa-miR-373-3p  | miR_373_000561    | 000561 | 1.163         | 0.282    | 0.243    | 0.9559 | 1.553         | 0.516    | 0.332    | 0.2848 |
| hsa-miR-374a-3p | miR_374a__002125  | 002125 | Not expressed |          |          |        | 1.350         | 0.608    | 0.450    | 0.7261 |
| hsa-miR-374a-5p | miR_374_000563    | 000563 | 1.361         | 138.204  | 101.531  | 0.4201 | 2.624         | 454.589  | 173.262  | 0.0566 |
| hsa-miR-374b-5p | miR_374_5p_001319 | 001319 | 2.059         | 102.310  | 49.681   | 0.1913 | 2.325         | 433.255  | 186.356  | 0.1694 |
| hsa-miR-375     | miR_375_000564    | 000564 | 1.544         | 413.395  | 267.678  | 0.4082 | 1.354         | 567.086  | 418.940  | 0.2453 |
| hsa-miR-376a-3p | miR_376a_000565   | 000565 | 2.325         | 180.370  | 77.568   | 0.2599 | 1.736         | 6.600    | 3.802    | 0.1994 |
| hsa-miR-376a-5p | miR_376a__002127  | 002127 | 2.040         | 0.495    | 0.243    | 0.0705 | Not expressed |          |          |        |
| hsa-miR-376b-3p | miR_376b_001102   | 001102 | Not expressed |          |          |        | 0.883         | 0.323    | 0.365    | 0.7463 |
| hsa-miR-376c-3p | miR_376c_002122   | 002122 | 2.439         | 420.882  | 172.594  | 0.1139 | 1.266         | 8.022    | 6.339    | 0.6256 |
| hsa-miR-378a-5p | miR_378_000567    | 000567 | 0.999         | 0.543    | 0.544    | 0.7148 | 0.645         | 0.271    | 0.420    | 0.3146 |



|                       |                       |        |               |               |              |               |   |               |          |         |        |
|-----------------------|-----------------------|--------|---------------|---------------|--------------|---------------|---|---------------|----------|---------|--------|
| <b>hsa-miR-379-5p</b> | <b>miR_379_001138</b> | 001138 | <b>2.425</b>  | <b>16.911</b> | <b>6.972</b> | <b>0.0378</b> | * | 0.614         | 0.533    | 0.869   | 0.3493 |
| hsa-miR-380-5p        | miR_380_5p_000570     | 000570 | 0.963         | 0.390         | 0.405        | 0.7541        |   | 1.067         | 0.446    | 0.418   | 0.6934 |
| hsa-miR-381-3p        | miR_381_000571        | 000571 | 1.338         | 0.976         | 0.730        | 0.7666        |   | 1.505         | 0.624    | 0.414   | 0.4666 |
| hsa-miR-382-5p        | miR_382_000572        | 000572 | 1.327         | 74.993        | 56.524       | 0.6546        |   | Not expressed |          |         |        |
| hsa-miR-383-5p        | miR_383_000573        | 000573 | 0.498         | 0.201         | 0.404        | 0.2472        |   | 0.123         | 0.186    | 1.508   | 0.0604 |
| hsa-miR-409-3p        | miR_409_3p_002332     | 002332 | 1.428         | 445.048       | 311.746      | 0.3814        |   | 0.858         | 7.583    | 8.837   | 0.5176 |
| hsa-miR-409-5p        | miR_409_5p_002331     | 002331 | 1.235         | 1.090         | 0.883        | 0.7112        |   | Not expressed |          |         |        |
| hsa-miR-410-3p        | miR_410_001274        | 001274 | 1.910         | 113.805       | 59.586       | 0.1333        |   | 1.316         | 4.425    | 3.364   | 0.7401 |
| hsa-miR-411-3p        | miR_411_002238        | 002238 | 2.218         | 0.539         | 0.243        | 0.0880        |   | Not expressed |          |         |        |
| hsa-miR-411-5p        | miR_411_001610        | 001610 | 2.190         | 51.949        | 23.726       | 0.1878        |   | 1.710         | 2.807    | 1.641   | 0.1777 |
| hsa-miR-422a          | miR_422a_002297       | 002297 | 1.065         | 0.310         | 0.291        | 0.9973        |   | Not expressed |          |         |        |
| hsa-miR-423-5p        | miR_423_5p_002340     | 002340 | 0.950         | 3.553         | 3.738        | 0.6929        |   | 0.344         | 3.125    | 9.095   | 0.1387 |
| hsa-miR-424-3p        | miR_424_002309        | 002309 | 1.441         | 11.467        | 7.960        | 0.4459        |   | 0.252         | 0.186    | 0.735   | 0.6928 |
| hsa-miR-424-5p        | miR_424_000604        | 000604 | 1.408         | 1.593         | 1.131        | 0.1724        |   | 0.994         | 0.330    | 0.332   | 0.1167 |
| hsa-miR-425-3p        | miR_425_002302        | 002302 | 1.645         | 1.963         | 1.193        | 0.4584        |   | 1.376         | 3.462    | 2.515   | 0.2093 |
| hsa-miR-425-5p        | miR_425_5p_001516     | 001516 | Not expressed |               |              |               |   | 0.006         | 0.186    | 33.530  | 0.1395 |
| hsa-miR-429           | miR_429_001024        | 001024 | 1.143         | 102.851       | 89.958       | 0.4709        |   | 1.794         | 305.850  | 170.514 | 0.1331 |
| hsa-miR-431-5p        | miR_431_001979        | 001979 | 1.083         | 14.258        | 13.162       | 0.5866        |   | Not expressed |          |         |        |
| hsa-miR-432-5p        | miR_432_001026        | 001026 | 1.971         | 5.951         | 3.019        | 0.8204        |   | 0.562         | 0.221    | 0.394   | 0.4306 |
| hsa-miR-433-3p        | miR_433_001028        | 001028 | 1.932         | 24.424        | 12.642       | 0.1723        |   | Not expressed |          |         |        |
| hsa-miR-449a          | miR_449_001030        | 001030 | 0.957         | 146.620       | 153.131      | 0.3715        |   | 1.081         | 494.219  | 457.131 | 0.2395 |
| hsa-miR-449b-5p       | miR_449b_001608       | 001608 | 1.331         | 352.136       | 264.621      | 0.6987        |   | 1.217         | 1088.320 | 894.326 | 0.2157 |
| hsa-miR-450a-5p       | miR_450a_002303       | 002303 | 0.841         | 0.259         | 0.308        | 0.4709        |   | Not expressed |          |         |        |
| hsa-miR-451a          | miR_451_001141        | 001141 | 1.089         | 6.798         | 6.242        | 0.8283        |   | 1.932         | 5.247    | 2.716   | 0.1513 |
| hsa-miR-452-5p        | miR_452_002329        | 002329 | 0.955         | 5.643         | 5.910        | 0.9165        |   | 1.796         | 43.378   | 24.149  | 0.2470 |
| hsa-miR-454-3p        | miR_454_002323        | 002323 | 1.101         | 43.046        | 39.109       | 0.4996        |   | 1.769         | 190.685  | 107.820 | 0.7874 |
| hsa-miR-454-5p        | miR_454_001996        | 001996 | Not expressed |               |              |               |   | 1.183         | 0.393    | 0.332   | 0.2824 |
| hsa-miR-455-3p        | miR_455_3p_002244     | 002244 | 0.913         | 19.112        | 20.934       | 0.4684        |   | 1.778         | 67.463   | 37.934  | 0.1093 |
| hsa-miR-455-5p        | miR_455_001280        | 001280 | 1.237         | 28.220        | 22.822       | 0.6344        |   | 1.843         | 86.627   | 47.000  | 0.2225 |
| hsa-miR-483-3p        | miR_483_3p_002339     | 002339 | 1.934         | 361.599       | 186.981      | 0.2066        |   | 0.017         | 0.186    | 10.832  | 0.0723 |

|                       |                       |               |               |          |          |        |               |              |              |               |   |
|-----------------------|-----------------------|---------------|---------------|----------|----------|--------|---------------|--------------|--------------|---------------|---|
| hsa-miR-483-5p        | miR_483_5p_002338     | 002338        | 1.426         | 2295.200 | 1609.283 | 0.1659 | 0.640         | 87.766       | 137.142      | 0.7788        |   |
| hsa-miR-484           | miR_484_001821        | 001821        | 0.864         | 975.266  | 1129.011 | 0.8248 | 1.625         | 2649.563     | 1630.298     | 0.2716        |   |
| hsa-miR-485-3p        | miR_485_3p_001277     | 001277        | 1.351         | 7.970    | 5.897    | 0.7944 | 0.499         | 0.186        | 0.372        | 0.2180        |   |
| hsa-miR-487a-3p       | miR_487a_001279       | 001279        | 0.684         | 0.257    | 0.376    | 0.4410 | Not expressed |              |              |               |   |
| hsa-miR-487b-3p       | miR_487b_001285       | 001285        | 2.434         | 22.077   | 9.070    | 0.1159 | 0.601         | 0.450        | 0.749        | 0.5480        |   |
| hsa-miR-489-3p        | miR_489_002358        | 002358        | 2.397         | 1.570    | 0.655    | 0.4750 | 0.946         | 0.612        | 0.647        | 0.7905        |   |
| hsa-miR-491-5p        | miR_491_001630        | 001630        | 1.238         | 5.114    | 4.131    | 0.4887 | 1.389         | 14.421       | 10.382       | 0.3859        |   |
| hsa-miR-492           | miR_492_001039        | 001039        | 1.109         | 0.269    | 0.243    | 0.9118 | Not expressed |              |              |               |   |
| hsa-miR-493-3p        | miR_493_002364        | 002364        | 2.828         | 2.644    | 0.935    | 0.0791 | Not expressed |              |              |               |   |
| hsa-miR-494-3p        | miR_494_002365        | 002365        | 1.776         | 13.272   | 7.472    | 0.1079 | 0.377         | 0.186        | 0.493        | 0.2289        |   |
| hsa-miR-495-3p        | miR_495_001663        | 001663        | 2.395         | 99.878   | 41.699   | 0.1488 | 0.597         | 1.107        | 1.854        | 0.1657        |   |
| hsa-miR-499a-5p       | miR_499_001352        | 001352        | Not expressed |          |          |        | 0.508         | 0.186        | 0.365        | 0.1691        |   |
| hsa-miR-500a-3p       | miR_500_001046        | 001046        | 0.605         | 0.201    | 0.333    | 0.1930 | 0.372         | 0.186        | 0.499        | 0.1492        |   |
| hsa-miR-500a-5p       | miR_500_002428        | 002428        | 1.125         | 12.480   | 11.096   | 0.7110 | 1.415         | 18.306       | 12.935       | 0.3434        |   |
| hsa-miR-501-3p        | miR_501_3p_002435     | 002435        | Not expressed |          |          |        | 0.236         | 0.186        | 0.787        | 0.1800        |   |
| hsa-miR-501-5p        | miR_501_001047        | 001047        | 0.211         | 0.201    | 0.954    | 0.2533 | Not expressed |              |              |               |   |
| hsa-miR-502-3p        | miR_502_3p_002083     | 002083        | 1.302         | 3.597    | 2.763    | 0.5034 | 1.119         | 4.875        | 4.357        | 0.4716        |   |
| hsa-miR-502-5p        | miR_502_001109        | 001109        | 1.489         | 4.450    | 2.990    | 0.4171 | 2.003         | 4.640        | 2.317        | 0.0624        |   |
| <b>hsa-miR-503-5p</b> | <b>miR_503_001048</b> | <b>001048</b> | 1.883         | 2.982    | 1.584    | 0.1116 | <b>2.129</b>  | <b>1.002</b> | <b>0.471</b> | <b>0.0154</b> | * |
| hsa-miR-505-3p        | miR_505_002089        | 002089        | Not expressed |          |          |        | 0.613         | 1.202        | 1.962        | 0.2553        |   |
| <b>hsa-miR-505-5p</b> | <b>miR_505_002087</b> | <b>002087</b> | 1.287         | 0.392    | 0.305    | 0.9787 | <b>0.191</b>  | <b>0.186</b> | <b>0.971</b> | <b>0.0169</b> | * |
| hsa-miR-506-3p        | miR_506_001050        | 001050        | 1.043         | 0.253    | 0.243    | 0.8285 | Not expressed |              |              |               |   |
| hsa-miR-508-3p        | miR_508_001052        | 001052        | 1.206         | 2.800    | 2.322    | 0.8957 | 0.854         | 0.437        | 0.511        | 0.5969        |   |
| hsa-miR-509-5p        | miR_509_5p_002235     | 002235        | 1.652         | 10.731   | 6.496    | 0.2161 | 1.017         | 0.989        | 0.972        | 0.7199        |   |
| hsa-miR-510-5p        | miR_510_002241        | 002241        | 1.133         | 0.399    | 0.352    | 0.8506 | Not expressed |              |              |               |   |
| hsa-miR-511-5p        | miR_511_001111        | 001111        | Not expressed |          |          |        | 0.875         | 0.564        | 0.644        | 0.6030        |   |
| hsa-miR-512-3p        | miR_512_3p_001823     | 001823        | 0.399         | 0.589    | 1.474    | 0.3616 | 5.939         | 3.067        | 0.516        | 0.0854        |   |
| hsa-miR-520c-3p       | miR_520c_3p_002400    | 002400        | 0.030         | 33.434   | 1104.389 | 0.7256 | 8.837         | 2.935        | 0.332        | 0.8373        |   |
| hsa-miR-520d-3p       | miR_520D_3P_002743    | 002743        | Not expressed |          |          |        | 1.090         | 0.362        | 0.332        | 0.2737        |   |
| hsa-miR-520e          | miR_520e_001119       | 001119        | 2.258         | 117.888  | 52.220   | 0.2950 | 1.387         | 122.332      | 88.169       | 0.1401        |   |

|                                                       |                           |               |               |         |         |        |               |              |              |               |   |
|-------------------------------------------------------|---------------------------|---------------|---------------|---------|---------|--------|---------------|--------------|--------------|---------------|---|
| hsa-miR-520f-3p                                       | miR_520f_001120           | 001120        | Not expressed |         |         |        | 0.778         | 0.258        | 0.332        | 0.8075        |   |
| hsa-miR-526b-5p                                       | miR_526b_002382           | 002382        | 0.484         | 0.201   | 0.416   | 0.1191 | Not expressed |              |              |               |   |
| hsa-miR-532-3p                                        | miR_532_3p_002355         | 002355        | 1.317         | 90.471  | 68.690  | 0.3238 | 1.194         | 135.026      | 113.063      | 0.2650        |   |
| hsa-miR-532-5p                                        | miR_532_001518            | 001518        | 1.293         | 232.150 | 179.485 | 0.3841 | 1.165         | 304.679      | 261.494      | 0.3963        |   |
| hsa-miR-539-5p                                        | miR_539_001286            | 001286        | 1.576         | 33.561  | 21.293  | 0.3600 | 0.853         | 0.905        | 1.060        | 0.4026        |   |
| hsa-miR-542-3p                                        | miR_542_3p_001284         | 001284        | 1.286         | 0.876   | 0.681   | 0.4621 | Not expressed |              |              |               |   |
| hsa-miR-543                                           | miR_543_002376            | 002376        | 2.044         | 11.322  | 5.540   | 0.0884 | 0.596         | 0.320        | 0.538        | 0.3455        |   |
| hsa-miR-545-3p                                        | miR_545_002267            | 002267        | Not expressed |         |         |        | 0.728         | 0.311        | 0.427        | 0.7356        |   |
| hsa-miR-548a-5p<br>hsa-miR-548c-5p<br>hsa-miR-548o-5p | miR_548c_5p_002429        | 002429        | 1.417         | 1.298   | 0.916   | 0.4741 | 1.609         | 1.595        | 0.991        | 0.0922        |   |
| hsa-miR-548b-5p                                       | miR_548b_5p_002408        | 002408        | 1.757         | 1.415   | 0.805   | 0.5619 | 1.680         | 2.466        | 1.468        | 0.0334        |   |
| <b>hsa-miR-548d-5p</b>                                | <b>miR_548d_5p_002237</b> | <b>002237</b> | 1.926         | 1.479   | 0.768   | 0.1540 | <b>3.381</b>  | <b>1.887</b> | <b>0.558</b> | <b>0.0148</b> | * |
| hsa-miR-550a-5p                                       | miR_550_002410            | 002410        | 1.122         | 0.273   | 0.243   | 0.9882 | 0.660         | 0.219        | 0.332        | 0.6238        |   |
| hsa-miR-551b-3p                                       | miR_551b_001535           | 001535        | 3.954         | 330.768 | 83.653  | 0.5696 | 1.801         | 9.230        | 5.124        | 0.6488        |   |
| hsa-miR-551b-5p                                       | miR_551b_002346           | 002346        | 1.797         | 0.436   | 0.243   | 0.5777 | 0.693         | 0.342        | 0.494        | 0.1498        |   |
| hsa-miR-564                                           | miR_564_001531            | 001531        | Not expressed |         |         |        | 0.488         | 0.186        | 0.380        | 0.2437        |   |
| hsa-miR-572                                           | miR_572_001614            | 001614        | 84.697        | 553.488 | 6.535   | 0.3676 | 0.185         | 8.173        | 44.275       | 0.7181        |   |
| hsa-miR-574-3p                                        | miR_574_3p_002349         | 002349        | 1.109         | 775.409 | 699.173 | 0.4021 | 1.261         | 1027.929     | 814.976      | 0.1404        |   |
| hsa-miR-576-3p                                        | miR_576_3p_002351         | 002351        | 1.535         | 0.373   | 0.243   | 0.1589 | 1.608         | 1.316        | 0.819        | 0.5226        |   |
| hsa-miR-577                                           | miR_577_002675            | 002675        | 2.157         | 0.680   | 0.315   | 0.3232 | 0.845         | 1.826        | 2.162        | 0.9466        |   |
| hsa-miR-579-3p                                        | miR_579_002398            | 002398        | 0.698         | 0.336   | 0.481   | 0.2369 | 1.315         | 1.154        | 0.878        | 0.7109        |   |
| hsa-miR-580-3p                                        | miR_580_001621            | 001621        | Not expressed |         |         |        | 0.888         | 0.295        | 0.332        | 0.9990        |   |
| hsa-miR-589-3p                                        | miR_589_001543            | 001543        | Not expressed |         |         |        | 0.217         | 0.186        | 0.855        | 0.0856        |   |
| hsa-miR-590-3p                                        | miR_590_3p_002677         | 002677        | 1.356         | 1.108   | 0.817   | 0.2771 | 2.147         | 5.713        | 2.661        | 0.0867        |   |
| hsa-miR-590-5p                                        | miR_590_5p_001984         | 001984        | 1.352         | 10.795  | 7.982   | 0.7665 | 2.099         | 41.233       | 19.647       | 0.1577        |   |
| hsa-miR-591                                           | miR_591_001545            | 001545        | 1.555         | 0.378   | 0.243   | 0.6036 | Not expressed |              |              |               |   |
| hsa-miR-592                                           | miR_592_001546            | 001546        | 0.970         | 0.236   | 0.243   | 0.8725 | 0.797         | 0.282        | 0.353        | 0.7239        |   |
| hsa-miR-595                                           | miR_595_001987            | 001987        | 0.665         | 0.201   | 0.303   | 0.2375 | Not expressed |              |              |               |   |
| hsa-miR-597-5p                                        | miR_597_001551            | 001551        | 1.915         | 1.234   | 0.644   | 0.3984 | 1.895         | 2.732        | 1.442        | 0.0272        |   |
| hsa-miR-598-3p                                        | miR_598_001988            | 001988        | 1.171         | 4.930   | 4.210   | 0.4129 | 1.835         | 19.245       | 10.485       | 0.2359        |   |

|                 |                   |        |               |         |         |        |               |         |         |        |
|-----------------|-------------------|--------|---------------|---------|---------|--------|---------------|---------|---------|--------|
| hsa-miR-601     | miR_601_001558    | 001558 | 18.506        | 35.682  | 1.928   | 0.4125 | 0.540         | 1.807   | 3.346   | 0.8551 |
| hsa-miR-604     | miR_604_001567    | 001567 | Not expressed |         |         |        | 0.734         | 0.244   | 0.332   | 0.7803 |
| hsa-miR-605-5p  | miR_605_001568    | 001568 | 7.618         | 1.851   | 0.243   | 0.3405 | Not expressed |         |         |        |
| hsa-miR-616-3p  | miR_616_002414    | 002414 | Not expressed |         |         |        | 1.763         | 0.694   | 0.394   | 0.6066 |
| hsa-miR-616-5p  | miR_616_001589    | 001589 | 1.062         | 0.258   | 0.243   | 0.8547 | 1.301         | 0.476   | 0.366   | 0.8965 |
| hsa-miR-618     | miR_618_001593    | 001593 | 11.032        | 2.680   | 0.243   | 0.4464 | 0.044         | 0.186   | 4.205   | 0.0702 |
| hsa-miR-622     | miR_622_001553    | 001553 | 1.108         | 0.842   | 0.760   | 0.8698 | 1.653         | 0.703   | 0.426   | 0.1886 |
| hsa-miR-624-5p  | miR_624_001557    | 001557 | Not expressed |         |         |        | 0.929         | 0.344   | 0.370   | 0.7802 |
| hsa-miR-625-3p  | miR_625_002432    | 002432 | 0.685         | 5.291   | 7.723   | 0.7131 | 0.674         | 13.657  | 20.256  | 0.0382 |
| hsa-miR-625-5p  | miR_625_002431    | 002431 | 0.986         | 0.289   | 0.293   | 0.3489 | 0.276         | 0.356   | 1.290   | 0.7269 |
| hsa-miR-627-5p  | miR_627_001560    | 001560 | Not expressed |         |         |        | 0.690         | 0.229   | 0.332   | 0.6923 |
| hsa-miR-628-3p  | miR_628_3p_002434 | 002434 | 1.782         | 0.433   | 0.243   | 0.2431 | 0.542         | 0.515   | 0.951   | 0.1502 |
| hsa-miR-628-5p  | miR_628_5p_002433 | 002433 | 0.609         | 0.486   | 0.797   | 0.4433 | 1.415         | 2.792   | 1.974   | 0.6872 |
| hsa-miR-629-3p  | miR_629_001562    | 001562 | 1.665         | 2.436   | 1.463   | 0.1528 | 0.915         | 4.004   | 4.375   | 0.8267 |
| hsa-miR-635     | miR_635_001578    | 001578 | 0.927         | 0.225   | 0.243   | 0.7128 | Not expressed |         |         |        |
| hsa-miR-636     | miR_636_002088    | 002088 | Not expressed |         |         |        | 3.753         | 2.203   | 0.587   | 0.8788 |
| hsa-miR-638     | miR_638_001582    | 001582 | 0.114         | 0.201   | 1.761   | 0.2179 | 0.926         | 1.813   | 1.958   | 0.2341 |
| hsa-miR-642a-5p | miR_642_001592    | 001592 | 1.058         | 18.506  | 17.492  | 0.8705 | 1.162         | 55.673  | 47.898  | 0.5363 |
| hsa-miR-645     | miR_645_001597    | 001597 | 0.954         | 0.608   | 0.638   | 0.6706 | 1.162         | 0.520   | 0.448   | 0.6887 |
| hsa-miR-650     | miR_650_001603    | 001603 | 0.321         | 0.201   | 0.627   | 0.2764 | Not expressed |         |         |        |
| hsa-miR-651-5p  | miR_651_001604    | 001604 | Not expressed |         |         |        | 0.863         | 0.287   | 0.332   | 0.9712 |
| hsa-miR-652-3p  | miR_652_002352    | 002352 | 1.656         | 37.150  | 22.434  | 0.3443 | 1.273         | 85.442  | 67.106  | 0.3885 |
| hsa-miR-654-3p  | miR_654_3p_002239 | 002239 | 1.488         | 0.361   | 0.243   | 0.3559 | Not expressed |         |         |        |
| hsa-miR-656-3p  | miR_656_001510    | 001510 | 5.208         | 2.930   | 0.563   | 0.2933 | Not expressed |         |         |        |
| hsa-miR-659-3p  | miR_659_001514    | 001514 | Not expressed |         |         |        | 0.121         | 0.186   | 1.534   | 0.0607 |
| hsa-miR-660-5p  | miR_660_001515    | 001515 | 1.414         | 254.171 | 179.756 | 0.3550 | 1.523         | 370.275 | 243.126 | 0.1494 |
| hsa-miR-664a-3p | miR_664_002897    | 002897 | 0.536         | 6.790   | 12.679  | 0.3054 | 1.592         | 43.902  | 27.580  | 0.6177 |
| hsa-miR-671-3p  | miR_671_3p_002322 | 002322 | 1.193         | 0.576   | 0.483   | 0.8681 | 1.670         | 1.559   | 0.933   | 0.7368 |
| hsa-miR-708-5p  | miR_708_002341    | 002341 | 1.280         | 10.431  | 8.149   | 0.5153 | 0.849         | 3.672   | 4.323   | 0.4958 |
| hsa-miR-7-1-3p  | miR_7_001338      | 001338 | 1.243         | 38.426  | 30.920  | 0.6591 | 1.812         | 85.496  | 47.194  | 0.8027 |
| hsa-miR-744-3p  | miR_744_002325    | 002325 | 0.845         | 0.651   | 0.771   | 0.7773 | 1.625         | 1.704   | 1.049   | 0.1976 |

|                       |                       |        |               |              |              |               |   |               |            |            |        |
|-----------------------|-----------------------|--------|---------------|--------------|--------------|---------------|---|---------------|------------|------------|--------|
| hsa-miR-744-5p        | miR_744_002324        | 002324 | 1.178         | 15.998       | 13.577       | 0.7086        |   | 1.061         | 37.625     | 35.457     | 0.0601 |
| hsa-miR-758-3p        | miR_758_001990        | 001990 | 1.888         | 1.359        | 0.720        | 0.5321        |   | Not expressed |            |            |        |
| hsa-miR-7-5p          | miR_7_000268          | 000268 | 1.551         | 1.251        | 0.807        | 0.2507        |   | 0.500         | 0.742      | 1.484      | 0.1967 |
| hsa-miR-765           | miR_765_002643        | 002643 | Not expressed |              |              |               |   | 0.526         | 0.186      | 0.353      | 0.1872 |
| hsa-miR-766-3p        | miR_766_001986        | 001986 | 0.655         | 0.686        | 1.049        | 0.9383        |   | 0.044         | 0.186      | 4.185      | 0.4038 |
| hsa-miR-769-5p        | miR_769_5p_001998     | 001998 | 1.193         | 13.076       | 10.956       | 0.3245        |   | 1.305         | 29.248     | 22.410     | 0.0765 |
| hsa-miR-885-5p        | miR_885_5p_002296     | 002296 | 6.786         | 9.257        | 1.364        | 0.2505        |   | 1.572         | 0.673      | 0.428      | 0.2869 |
| hsa-miR-888-5p        | miR_888_002212        | 002212 | 0.206         | 2.727        | 13.269       | 0.6513        |   | 0.930         | 4.401      | 4.730      | 0.6371 |
| <b>hsa-miR-889-3p</b> | <b>miR_889_002202</b> | 002202 | <b>2.094</b>  | <b>6.021</b> | <b>2.876</b> | <b>0.0571</b> | * | 0.659         | 0.242      | 0.368      | 0.5155 |
| hsa-miR-890           | miR_890_002209        | 002209 | 1.045         | 0.254        | 0.243        | 0.8868        |   | 1.533         | 0.548      | 0.357      | 0.6208 |
| hsa-miR-891a-5p       | miR_891a_002191       | 002191 | 0.793         | 0.522        | 0.658        | 0.7198        |   | 0.820         | 2.683      | 3.270      | 0.3763 |
| hsa-miR-92a-3p        | miR_92a_000431        | 000431 | 1.455         | 859.113      | 590.335      | 0.6657        |   | 1.294         | 2042.378   | 1577.911   | 0.1772 |
| hsa-miR-93-3p         | miR_93_002139         | 002139 | 1.085         | 6.134        | 5.652        | 0.6342        |   | 1.045         | 17.051     | 16.312     | 0.4800 |
| hsa-miR-934           | miR_934_002177        | 002177 | Not expressed |              |              |               |   | 0.641         | 0.318      | 0.496      | 0.3112 |
| hsa-miR-93-5p         | miR_93_001090         | 001090 | 1.114         | 119.883      | 107.607      | 0.0939        |   | 1.333         | 588.687    | 441.712    | 0.2640 |
| hsa-miR-9-3p          | miR_9_002231          | 002231 | 1.122         | 3.157        | 2.813        | 0.3800        |   | 0.435         | 0.186      | 0.427      | 0.1685 |
| hsa-miR-942-5p        | miR_942_002187        | 002187 | 1.151         | 3.127        | 2.716        | 0.4259        |   | 1.119         | 5.330      | 4.764      | 0.5080 |
| hsa-miR-944           | miR_944_002189        | 002189 | 0.740         | 0.201        | 0.272        | 0.5217        |   | Not expressed |            |            |        |
| hsa-miR-95-3p         | miR_95_000433         | 000433 | 1.299         | 49.691       | 38.250       | 0.7692        |   | 1.343         | 107.858    | 80.327     | 0.0565 |
| hsa-miR-9-5p          | miR_9_000583          | 000583 | 0.943         | 22.283       | 23.625       | 0.6400        |   | 0.062         | 0.186      | 2.981      | 0.3138 |
| hsa-miR-96-5p         | miR_96_000186         | 000186 | 0.823         | 0.361        | 0.438        | 0.1710        |   | 1.416         | 0.667      | 0.471      | 0.1216 |
| hsa-miR-98-5p         | miR_98_000577         | 000577 | 13.054        | 10.585       | 0.811        | 0.3910        |   | 12.902        | 62.131     | 4.815      | 0.1585 |
| hsa-miR-99a-3p        | miR_99a_002141        | 002141 | 2.337         | 1.180        | 0.505        | 0.2049        |   | 2.283         | 6.068      | 2.659      | 0.2084 |
| hsa-miR-99a-5p        | miR_99a_000435        | 000435 | 1.520         | 979.404      | 644.395      | 0.3902        |   | 1.910         | 1252.246   | 655.584    | 0.3286 |
| hsa-miR-99b-3p        | miR_99b_002196        | 002196 | 1.509         | 2.079        | 1.378        | 0.6783        |   | 1.185         | 3.832      | 3.234      | 0.0214 |
| hsa-miR-99b-5p        | miR_99b_000436        | 000436 | 1.412         | 833.248      | 589.941      | 0.5279        |   | 1.312         | 1613.947   | 1230.417   | 0.2294 |
| hsa-miR-1247**        | miR_1274A_002883      | 002883 | 1.262         | 14631.278    | 11589.847    | 0.3726        |   | 1.437         | 8289.140   | 5767.356   | 0.1656 |
| hsa-miR-720*          | miR_720_002895        | 002895 | 1.460         | 14041.066    | 9616.656     | 0.9790        |   | 1.107         | 7718.297   | 6973.357   | 0.1811 |
| hsa-miR-378*          | miR_378_002243        | 002243 | 3.935         | 5.074        | 1.289        | 0.4692        |   | 0.341         | 0.771      | 2.261      | 0.2189 |
| hsa-miR-139-5p*       | miR_139_5p_002289     | 002289 | 1.536         | 5.893        | 3.837        | 0.4913        |   | 1.622         | 7.958      | 4.905      | 0.4587 |
| hsa-miR-1247B*        | miR_1274B_00288       | 002884 | 1.240         | 326720.001   | 263545.684   | 0.0989        |   | 1.227         | 255409.342 | 208185.686 | 0.5448 |

|                 |                   |        |               |         |         |        |       |        |         |        |
|-----------------|-------------------|--------|---------------|---------|---------|--------|-------|--------|---------|--------|
| 4               |                   |        |               |         |         |        |       |        |         |        |
| hsa-miR-886-3p* | miR_886_3p_002194 | 002194 | 1.135         | 205.500 | 181.046 | 0.4159 | 0.711 | 76.172 | 107.124 | 0.6412 |
| hsa-miR-1300*   | miR_1300_002902   | 002902 | Not expressed |         |         |        | 0.784 | 0.400  | 0.510   | 0.7397 |
| hsa-miR-1201*   | miR_1201_002781   | 002781 | Not expressed |         |         |        | 0.722 | 0.240  | 0.332   | 0.7575 |
| hsa-miR-886-5p* | miR_886_5p_002193 | 002193 | 0.978         | 203.710 | 208.300 | 0.5650 | 0.646 | 34.500 | 53.376  | 0.8679 |
| hsa-miR-338-5p* | miR_338_5P_002658 | 002658 | 0.471         | 0.201   | 0.427   | 0.2030 | 1.919 | 6.546  | 3.410   | 0.9064 |

---

\* miRNAs no longer present in the version of miRBase.
