# Supplementary material for: Extracellular Vesicles and Their miRNA Content in Amniotic and Tracheal Fluids of Fetuses with Severe Congenital Diaphragmatic Hernia Undergoing Fetal Intervention
Source: MDPI journal article supplement (doi:10.3390/cells10061493), 2021-06-14
Supplement: s1 [file s1]

**Supplementary Table S1**

**MISEV 2018 guidelines compliance**

|    | Section title                                                     | Required information according to MISEV2018                                                                                                                        | Mandatory requirement | Not applicable/not available | Our approach                                                        | Compliance with MISEV2018 requirements |
|----|-------------------------------------------------------------------|--------------------------------------------------------------------------------------------------------------------------------------------------------------------|-----------------------|------------------------------|---------------------------------------------------------------------|----------------------------------------|
| 1  | Nomenclature                                                      | The term extracellular vesicle (EV) can be used with demonstration of extracellular (no intact cells) and vesicular nature per these characterization and function | YES                   |                              | The term extracellular vesicle (EV) has been used in the manuscript | YES                                    |
| 2a | Collection and pre-processing (tissue culture conditioned medium) | General cell characterization                                                                                                                                      | YES                   | N/A                          |                                                                     |                                        |
| 2a | Collection and pre-processing (tissue culture conditioned medium) | Medium used before and during collection (additives, serum, other)                                                                                                 | YES                   | N/A                          |                                                                     |                                        |
| 2a | Collection and pre-processing                                     | Exact protocol for depletion of EVs from                                                                                                                           | YES                   | N/A                          |                                                                     |                                        |

|           |                                                                   |                                                                                                                                                                                            |     |  |                                                       |     |
|-----------|-------------------------------------------------------------------|--------------------------------------------------------------------------------------------------------------------------------------------------------------------------------------------|-----|--|-------------------------------------------------------|-----|
|           | (tissue culture conditioned medium)                               | additives in collection medium                                                                                                                                                             |     |  |                                                       |     |
| 2a        | Collection and pre-processing (tissue culture conditioned medium) | Nature and size of culture vessels, and volume of medium during conditioning<br><br>e) specific culture conditions (treatment, % O2, coating,polarization...) before and during collection | N/A |  |                                                       |     |
| 2a        | Collection and pre-processing (tissue culture conditioned medium) | Number of cells/ml and % of live/ dead cells at time of collection                                                                                                                         | N/A |  |                                                       |     |
| 2a        | Collection and pre-processing (tissue culture conditioned medium) | Frequency and interval of Conditioned Medium harvest                                                                                                                                       | N/A |  |                                                       |     |
| 2b and 2c | Collection and pre-processing (Biofluids or                       | Donor status if available (age, sex, food/water                                                                                                                                            | YES |  | Complete clinical information on maternal status were | YES |

|           |                                                      |                                                                                 |     |  |                                                                                                                                                                                                                        |     |
|-----------|------------------------------------------------------|---------------------------------------------------------------------------------|-----|--|------------------------------------------------------------------------------------------------------------------------------------------------------------------------------------------------------------------------|-----|
|           | tissues)                                             | intake, collection time, disease, medication, other)                            |     |  | available.                                                                                                                                                                                                             |     |
| 2b and 2c | Collection and pre-processing (Biofluids or tissues) | Volume of biofluid or volume/mass of tissue sample collected per donor          | YES |  | For each subject, we recorded the total volume of amniotic/tracheal fluid collected                                                                                                                                    | YES |
| 2b and 2c | Collection and pre-processing (Biofluids or tissues) | Total volume/mass used for EV isolation (if pooled from several donors)         | YES |  | EVs isolation was performed starting from a standardized volume of fluids for each subject. Each EVs pellet aliquot obtained from each subject was then resuspended in 1 mL of PBS triple filtered (pore size 0.1 µm). | YES |
| 2b and 2c | Collection and pre-processing (Biofluids or tissues) | All known collection conditions, including additives, at time of collection     |     |  | No additives.                                                                                                                                                                                                          | YES |
| 2b and 2c | Collection and pre-processing (Biofluids or tissues) | Pre-treatment to separate major fluid-specific contaminants before EV isolation |     |  | Samples (amniotic and tracheal fluids) were centrifuged three times at increasing speeds (1000 g, 2000 g, 3000 g) for 15 min at 4 °C to remove cell debris and aggregates.                                             | YES |

|           |                                                      |                                                                                                                                                                         |     |     |                                                                                                                                        |     |
|-----------|------------------------------------------------------|-------------------------------------------------------------------------------------------------------------------------------------------------------------------------|-----|-----|----------------------------------------------------------------------------------------------------------------------------------------|-----|
| 2b and 2c | Collection and pre-processing (Biofluids or tissues) | Temperature and time of biofluid/tissue handling before and during pre-treatment                                                                                        |     |     | Each sample was processed within 2 hrs from collection for EV characterization. An EV pellet was frozen at -80°C for miRNA extraction. | YES |
| 2b and 2c | Collection and pre-processing (Biofluids or tissues) | For cultured tissue explants: volume, nature of medium and time of culture before collecting conditioned medium                                                         |     | N/A |                                                                                                                                        |     |
| 2b and 2c | Collection and pre-processing (Biofluids or tissues) | For direct tissue EV extraction: treatment of tissue to release vesicles without disrupting cells                                                                       |     | N/A |                                                                                                                                        |     |
| 2d        | Storage and recovery                                 | Storage and recovery (e.g., thawing) of CCM, biofluid, or tissue before EV isolation (storage temperature, vessel, time; method of thawing or other sample preparation) | N/A |     |                                                                                                                                        |     |

|    |                                 |                                                                                                                                                                                                          |     |  |                                                                                                                                                                                                                                                                                                                                                                                                                                                                                                                                                                                                                                                                                                           |     |
|----|---------------------------------|----------------------------------------------------------------------------------------------------------------------------------------------------------------------------------------------------------|-----|--|-----------------------------------------------------------------------------------------------------------------------------------------------------------------------------------------------------------------------------------------------------------------------------------------------------------------------------------------------------------------------------------------------------------------------------------------------------------------------------------------------------------------------------------------------------------------------------------------------------------------------------------------------------------------------------------------------------------|-----|
| 2d | Storage and recovery            | Storage and recovery of EVs after isolation (temperature, vessel, time, additive(s)...)                                                                                                                  | YES |  | Isolated EVs were immediately characterized by flow cytometry and Nanosight. . An EV pellet was frozen at -80°C for miRNA extraction.                                                                                                                                                                                                                                                                                                                                                                                                                                                                                                                                                                     | YES |
| 3  | EV separation and concentration | Centrifugation: reference number of tube(s), rotor(s), adjusted k factor(s) of each centrifugation step (= time+ speed+ rotor, volume/density of centrifugation conditions), temperature, brake settings | YES |  | We applied a differential ultracentrifugation with previous lower-speed steps. Amniotic and tracheal fluids were centrifuged at 1000, 2000, and 3000 × g for 15 min at 4 °C (Haereus Labofuge 400R, Hanau, Germany). The obtained pellets were discarded to remove cells, apoptotic bodies and cell debris. EVs were then isolated from supernatants by ultracentrifugation at 110,000 × g for 75 minutes at 4 °C in polypropylene ultracentrifuge tubes (Quick-Seal ultra-clear centrifuge tubes, Beckman Coulter; Brea, CA, USA) rotor MLA-55 (Beckman Coulter), filled with PBS previously filtered through a 0.10-µm pore-size polyethersulfone filter (StericupRVP, Merck Millipore; Burlington, MA, | YES |

|   |                                 |                                                                                                                                                                                                 |  |     |                                                                                                                                           |  |
|---|---------------------------------|-------------------------------------------------------------------------------------------------------------------------------------------------------------------------------------------------|--|-----|-------------------------------------------------------------------------------------------------------------------------------------------|--|
|   |                                 |                                                                                                                                                                                                 |  |     | USA). Our method is included in the category “Intermediate recovery, intermediate specificity = mixed EVs with limited non-EV components” |  |
| 3 | EV separation and concentration | Density gradient: nature of matrix, method of generating gradient, reference (and size) of tubes, centrifugation speed and time (with brake specified), method and volume of fraction recovery. |  | N/A |                                                                                                                                           |  |
| 3 | EV separation and concentration | Chromatography: matrix (nature, pore size,...), loaded sample volume, fraction volume, number                                                                                                   |  | N/A |                                                                                                                                           |  |
| 3 | EV separation and concentration | Precipitation: reference of polymer, ratio vol/vol or weight/vol polymer/fluid, time/temperature of incubation, time/speed/temperatur                                                           |  | N/A |                                                                                                                                           |  |

|    |                                 |                                                                                                                                                            |     |     |  |  |
|----|---------------------------------|------------------------------------------------------------------------------------------------------------------------------------------------------------|-----|-----|--|--|
|    |                                 | e of centrifugation                                                                                                                                        |     |     |  |  |
| 3  | EV separation and concentration | Filtration: reference of filter type (=nature of membrane, pore size...), time and speed of centrifugation, volume before/after (in case of concentration) |     | N/A |  |  |
| 3  | EV separation and concentration | Antibody-based : reference of antibodies, mass Ab/amount of EVs, nature of Ab carrier (bead, surface) and amount of Ab/carrier surface                     |     | N/A |  |  |
| 3  | EV separation and concentration | Other...: all necessary details to allow replication                                                                                                       |     | N/A |  |  |
| 3  | EV separation and concentration | Additional step(s) to concentrate, if any                                                                                                                  |     | N/A |  |  |
| 3  | EV separation and concentration | Additional step(s) to wash matrix and/or sample, if any                                                                                                    |     | N/A |  |  |
| 4a | EV characterization,            | Volume of fluid, and/or cell number, and/or tissue mass used to                                                                                            | N/A |     |  |  |

|    | Quantification                            | isolate EVs                                                                                                                                                                                        |     |  |                                                                                                                                                                                                                                                                                                                                                                                                                                                                                                                                                                                                                                                                                                                                                                                  |     |
|----|-------------------------------------------|----------------------------------------------------------------------------------------------------------------------------------------------------------------------------------------------------|-----|--|----------------------------------------------------------------------------------------------------------------------------------------------------------------------------------------------------------------------------------------------------------------------------------------------------------------------------------------------------------------------------------------------------------------------------------------------------------------------------------------------------------------------------------------------------------------------------------------------------------------------------------------------------------------------------------------------------------------------------------------------------------------------------------|-----|
| 4a | EV<br>characterization,<br>Quantification | Global quantification by<br>at least 2 methods:<br>protein amount, particle<br>number, lipid amount,<br>expressed per volume<br>of initial fluid or number<br>of producing cells/mass<br>of tissue | YES |  | <p>In order to quantify the total number of EVs we applied the two following approaches:</p> <p>1) Nanoparticle tracking analysis by NanoSight LM10-HS system (Malvern Panalytical Ltd, Malvern, UK). Five 30-s recordings were made for each sample. Collected data were analyzed with NTA software (Malvern Panalytical Ltd.), which provided high-resolution particle-size distribution profiles as well as measurements of the EV concentration.</p> <p>2) High resolution Flow cytometry by MACSQuant, Miltenyi Biotec. In order to analyze EV integrity, 60 µl aliquots were stained with 0.2 µM 5(6)-carboxyfluorescein diacetate N-succinimidyl ester (CFSE) at 37 °C for 20 min in the dark. CFSE is a cell-permeant, non-fluorescent pro-dye. If incorporated into</p> | YES |



|    |                                               |                                                                                                                                                                                              |     |     |                                                                                                                                                                                                                                                                                                                                                                                                                                     |     |
|----|-----------------------------------------------|----------------------------------------------------------------------------------------------------------------------------------------------------------------------------------------------|-----|-----|-------------------------------------------------------------------------------------------------------------------------------------------------------------------------------------------------------------------------------------------------------------------------------------------------------------------------------------------------------------------------------------------------------------------------------------|-----|
|    |                                               |                                                                                                                                                                                              |     |     | intact EVs, which contain esterases as live cells, the acetate groups of CFSE is cleaved producing a membrane-impermeant molecule with green fluorescence.                                                                                                                                                                                                                                                                          |     |
| 4a | EV characterization, Quantification           | Ratio of the 2 quantification figures                                                                                                                                                        | YES | N/A |                                                                                                                                                                                                                                                                                                                                                                                                                                     |     |
| 4b | EV characterization, General Characterization | <p>At least <u>three</u> positive protein markers of EVs, including at least one transmembrane/lipid bound protein and one cytosolic protein</p> <p>At least one negative protein marker</p> | YES |     | <p>The following antibodies have been used to measure positive protein markers of plasmatic EVs:</p> <p>CD66+ (neutrophils)<br/> CD14+ (monocytes/macrophages)<br/> CD105+ (endothelium)<br/> EpCAM+ (epithelium)<br/> HLA-G+ (Trophoblast)<br/> HERV-W+ (Syncytin-1 protein, placenta)</p> <p><u>Transmembrane, tissue specific and focus of the present study.</u></p> <p>CFSE staining was used to assess cytosolic esterase</p> | YES |

|    |                            |                                                                                                                                                                                                                                       |     |  |                                                                                                                                                                                                                                                                            |     |
|----|----------------------------|---------------------------------------------------------------------------------------------------------------------------------------------------------------------------------------------------------------------------------------|-----|--|----------------------------------------------------------------------------------------------------------------------------------------------------------------------------------------------------------------------------------------------------------------------------|-----|
|    |                            |                                                                                                                                                                                                                                       |     |  | activity. As negative control, representative EVs samples were incubated with Tween20 (P1379; Merk, Sigma-Aldrich) ON at 37 °C, and then incubated with CFSE as described above. Positivity for CFSE fluorescence was evaluated by High Resolution Flow cytometry analysis |     |
| 4c | Single EV characterization | Images of single EVs by electron microscopy                                                                                                                                                                                           | YES |  | Transmission Electron Microscopy (TEM) analysis was performed on random samples as quality control.                                                                                                                                                                        | YES |
| 4c | Single EV characterization | Non-image-based method analysing large numbers of single EVs:<br>Non-image-based method analysing large numbers of single EVs: NTA, TRPS, FCS, high-resolution flow cytometry, multi-angle light-scattering, Raman spectroscopy, etc. | YES |  | NTA and Flow Cytometry were performed                                                                                                                                                                                                                                      | YES |
| 5  | Functional studies         | Dose-response assessment                                                                                                                                                                                                              | N/A |  |                                                                                                                                                                                                                                                                            |     |

|   |                    |                                                                                                                                              |     |  |  |  |
|---|--------------------|----------------------------------------------------------------------------------------------------------------------------------------------|-----|--|--|--|
| 5 | Functional studies | Negative control = nonconditioned medium, biofluid/tissue from control donors, as applicable                                                 | N/A |  |  |  |
| 5 | Functional studies | Quantitative comparison of functional activity of total fluid, vs EV-depleted fluid, vs EVs (after high recovery/low specificity separation) | N/A |  |  |  |
| 5 | Functional studies | Quantitative comparison of functional activity of EVs vs other EPs/fractions after low recovery/high specificity separation                  | N/A |  |  |  |
| 5 | Functional studies | Quantitative comparison of activity of EV subtypes (if subtype-specific                                                                      | N/A |  |  |  |

|   |                    |                                                                                                                   |     |     |  |  |
|---|--------------------|-------------------------------------------------------------------------------------------------------------------|-----|-----|--|--|
|   |                    | function claimed)                                                                                                 |     |     |  |  |
| 5 | Functional studies | Extent of functional activity in the absence of contact between EV donor and EV recipient                         | N/A |     |  |  |
| 6 | Reporting          | Submission of data (proteomic, sequencing, other) to relevant public, curated databases or open-access repository | YES | N/A |  |  |
