# Supplementary material for: Extracellular Vesicles and Their miRNA Content in Amniotic and Tracheal Fluids of Fetuses with Severe Congenital Diaphragmatic Hernia Undergoing Fetal Intervention
Source: MDPI journal article supplement (doi:10.3390/cells10061493), 2021-06-14
Supplement: s1 [file s1]

**Table S4.** miRNA validation in Amniotic and Tracheal Fluids

|                   | miRNA             | Mean copies/ $\mu$ l<br>survivors | 95% CI      | Mean copies/ $\mu$ l<br>non-survivors | 95% CI       | p-value |
|-------------------|-------------------|-----------------------------------|-------------|---------------------------------------|--------------|---------|
| Tracheal<br>fluid | <b>mir-223-3p</b> | 203,9                             | 119,5-348,1 | 526,8                                 | 260,2-1066,5 | 0,03    |
|                   | <b>mir-503-5p</b> | 11,6                              | 8,2-16,4    | 19                                    | 13,4-26,8    | 0,05    |
|                   | mir-548d-5p       | 78,6                              | 53,2-116,1  | 128,3                                 | 18,0-211,0   | 0,13    |
|                   | mir-29b-3p        | 290                               | 185,8-452,7 | 424,5                                 | 258,3-697,7  | 0,26    |
|                   | mir-17-3p         | 21,8                              | 11,3-42,0   | 37,5                                  | 17,0-83,0    | 0,3     |
|                   | mir-200a-5p       | 331,2                             | 215,0-510,3 | 413                                   | 254,9-669,1  | 0,5     |
|                   | mir-505-5p        | 47,2                              | 29,1-76,5   | 37,8                                  | 21,9-65,1    | 0,55    |
|                   | mir-200b-5p       | 561,1                             | 336,2-936,3 | 643,5                                 | 363,0-1140,5 | 0,73    |
| Amniotic<br>fluid | <b>mir-889-3p</b> | 103,9                             | 66,2-162,9  | 209,7                                 | 134,1-327,7  | 0,03    |
|                   | <b>mir-379-5p</b> | 129,3                             | 74,6-224,0  | 299,5                                 | 173,3-517,5  | 0,03    |
|                   | mir-190-5p        | 137,3                             | 85,3-220,9  | 240,9                                 | 150,0-386,7  | 0,1     |
