# Supplementary material for: Extracellular Vesicles and Their miRNA Content in Amniotic and Tracheal Fluids of Fetuses with Severe Congenital Diaphragmatic Hernia Undergoing Fetal Intervention
Source: MDPI journal article supplement (doi:10.3390/cells10061493), 2021-06-14
Supplement: s1 [file s1]

**Table S2.** Mean concentrations of EV subtypes in survivors and non-survivors estimated by linear Poisson regression models, allowing for overdispersion.

|                                                             | Tracheal fluid |                 |               |                   |         | Amniotic fluid |               |               |               |         |
|-------------------------------------------------------------|----------------|-----------------|---------------|-------------------|---------|----------------|---------------|---------------|---------------|---------|
|                                                             | Survivors      |                 | Non-survivors |                   | P-value | Survivors      |               | Non-survivors |               | P-value |
|                                                             | Mean           | 95% CI          | Mean          | 95% CI            |         | Mean           | 95% CI        | Mean          | 95% CI        |         |
| Nanoparticle Tracking Analysis (count *10 <sup>6</sup> /ml) |                |                 |               |                   |         |                |               |               |               |         |
| Total EV                                                    | 384307         | (383811;384804) | 1197863       | (1196625;1199102) | <0,0001 | 19936          | (19812;20060) | 25573         | (25112;25390) | <0,0001 |
| Exosomes                                                    | 16888          | (16784;16992)   | 32847         | (32643;33053)     | <0,0001 | 304            | (289;319)     | 322           | (307;338)     | 0,0965  |
| MV                                                          | 367420         | (366935;367905) | 1165016       | (1163795;1166238) | <0,0001 | 19632          | (19510;19755) | 25251         | (25112;25390) | <0,0001 |
| Flow Cytometry (count *10 <sup>3</sup> /ml)                 |                |                 |               |                   |         |                |               |               |               |         |
| CD66+ (neutrophils)                                         | 89             | (81;97)         | 86            | (76;97)           | 0,6873  | 344            | (326;362)     | 486           | (467;506)     | <0,0001 |
| CD14+ (monocytes)                                           | 57             | (51;63)         | 76            | (67;87)           | 0,0005  | 264            | (249;281)     | 376           | (360;394)     | <0,0001 |
| CD105+ (endothelium)                                        | 52             | (47;58)         | 78            | (69;89)           | <0,0001 |                |               | n/a           |               |         |
| EpCAM+ (epithelium)                                         | 60             | (54;66)         | 79            | (69;89)           | 0,0010  | 251            | (236;267)     | 390           | (373;407)     | <0,0001 |
| HLA-G+ (placenta)                                           |                |                 | n/a           |                   |         | 272            | (256;288)     | 389           | (372;407)     | <0,0001 |
| HERV-W+ (placenta)                                          |                |                 | n/a           |                   |         | 290            | (273;307)     | 329           | (314;345)     | 0,0008  |
